# Supplementary material
Source: Research Square preprint supplement (doi:10.21203/rs.3.rs-9158731/v1)
Supplement: Supplementary file 1 [file c052293633550a17e109aa25.docx]

Supplementary Material

# Supplementary data

**Supplementary Fig 1**


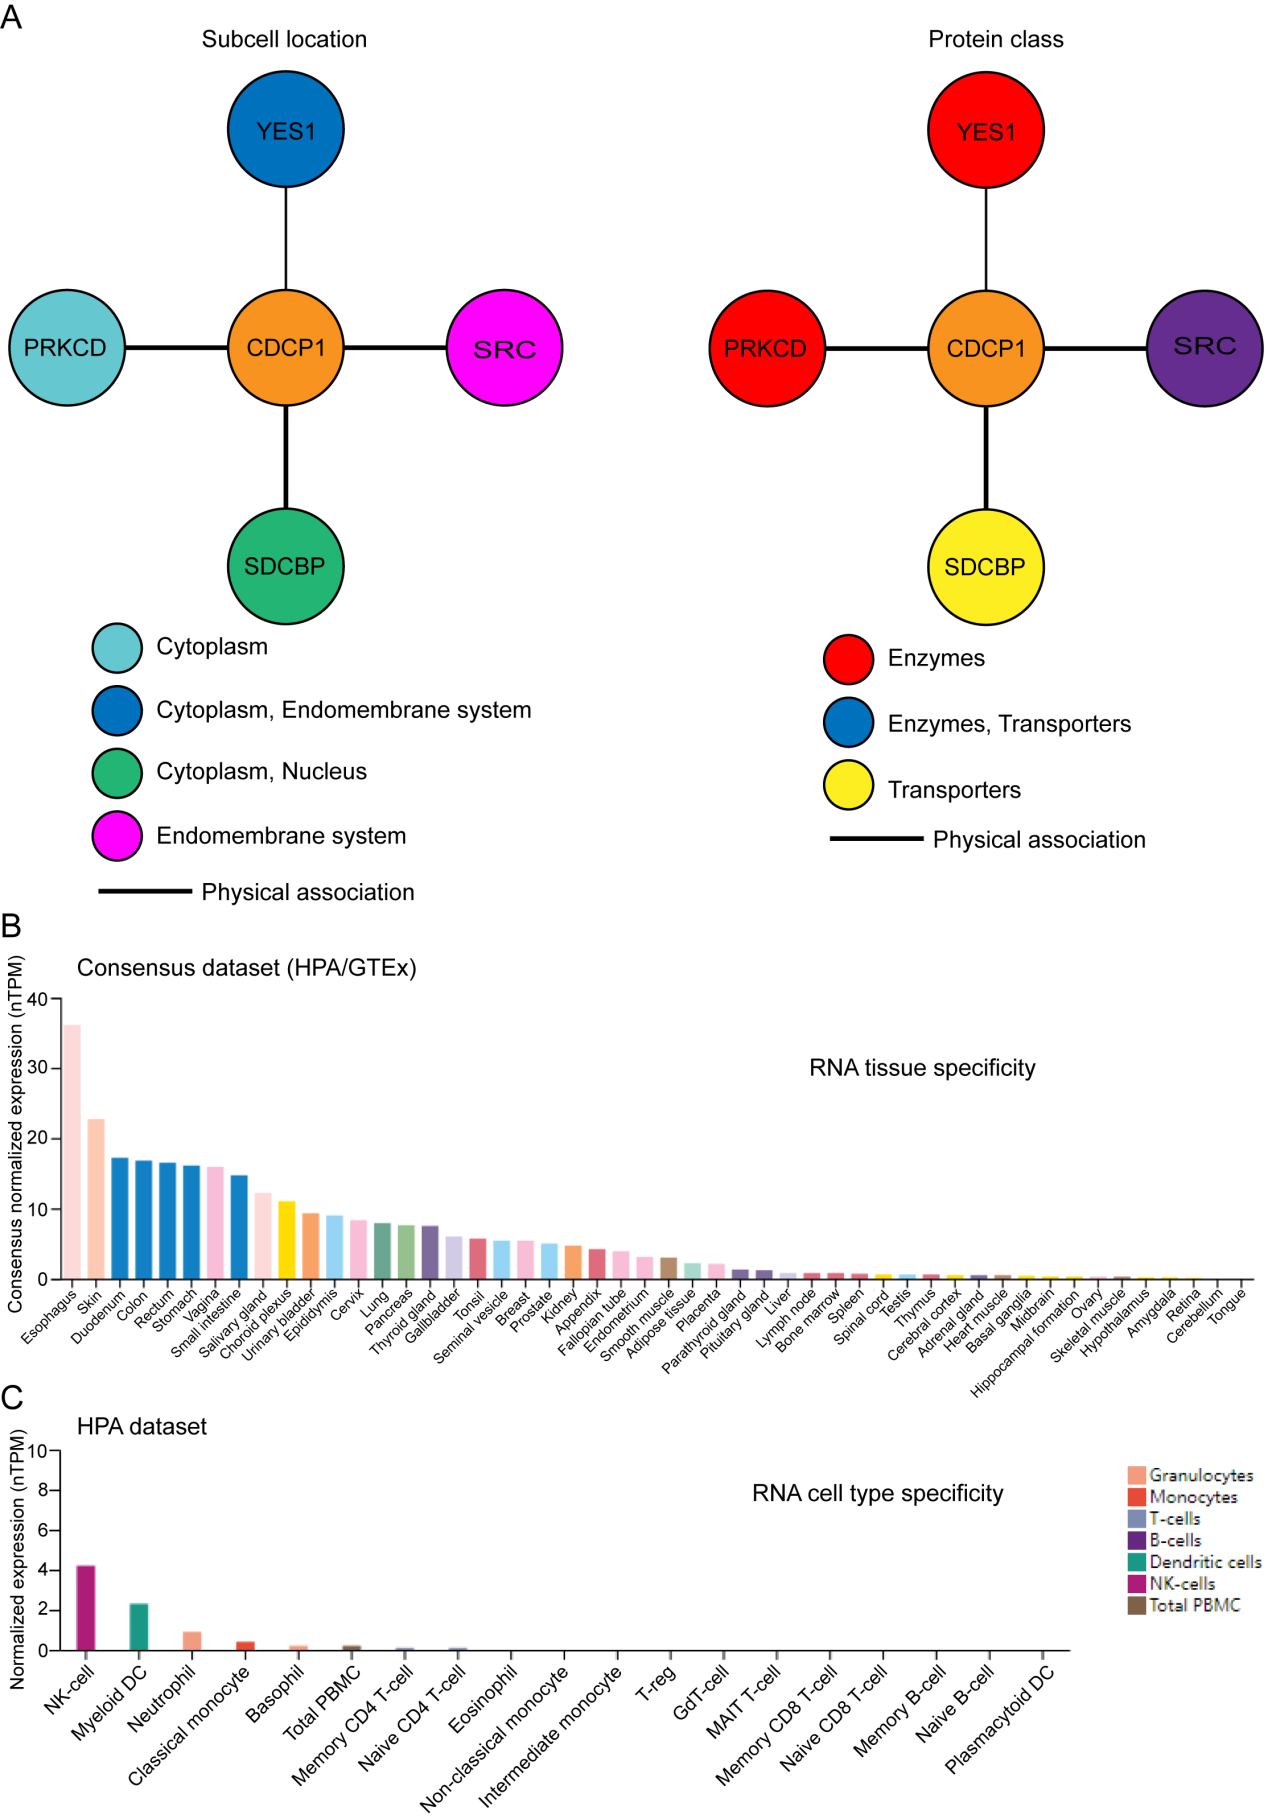


Interaction of CDCP1 and its expression levels in normal tissues and immune cells. (A) CDCP1-gene interactions at subcellular and protein levels. (B) The consensus database of HPA and GTEx was used to search the expression difference of CDCP1 gene in different normal tissues. (C) The differential expression of CDCP1 gene in various immune cells was analyzed by HPA database

**Supplementary Fig 2**


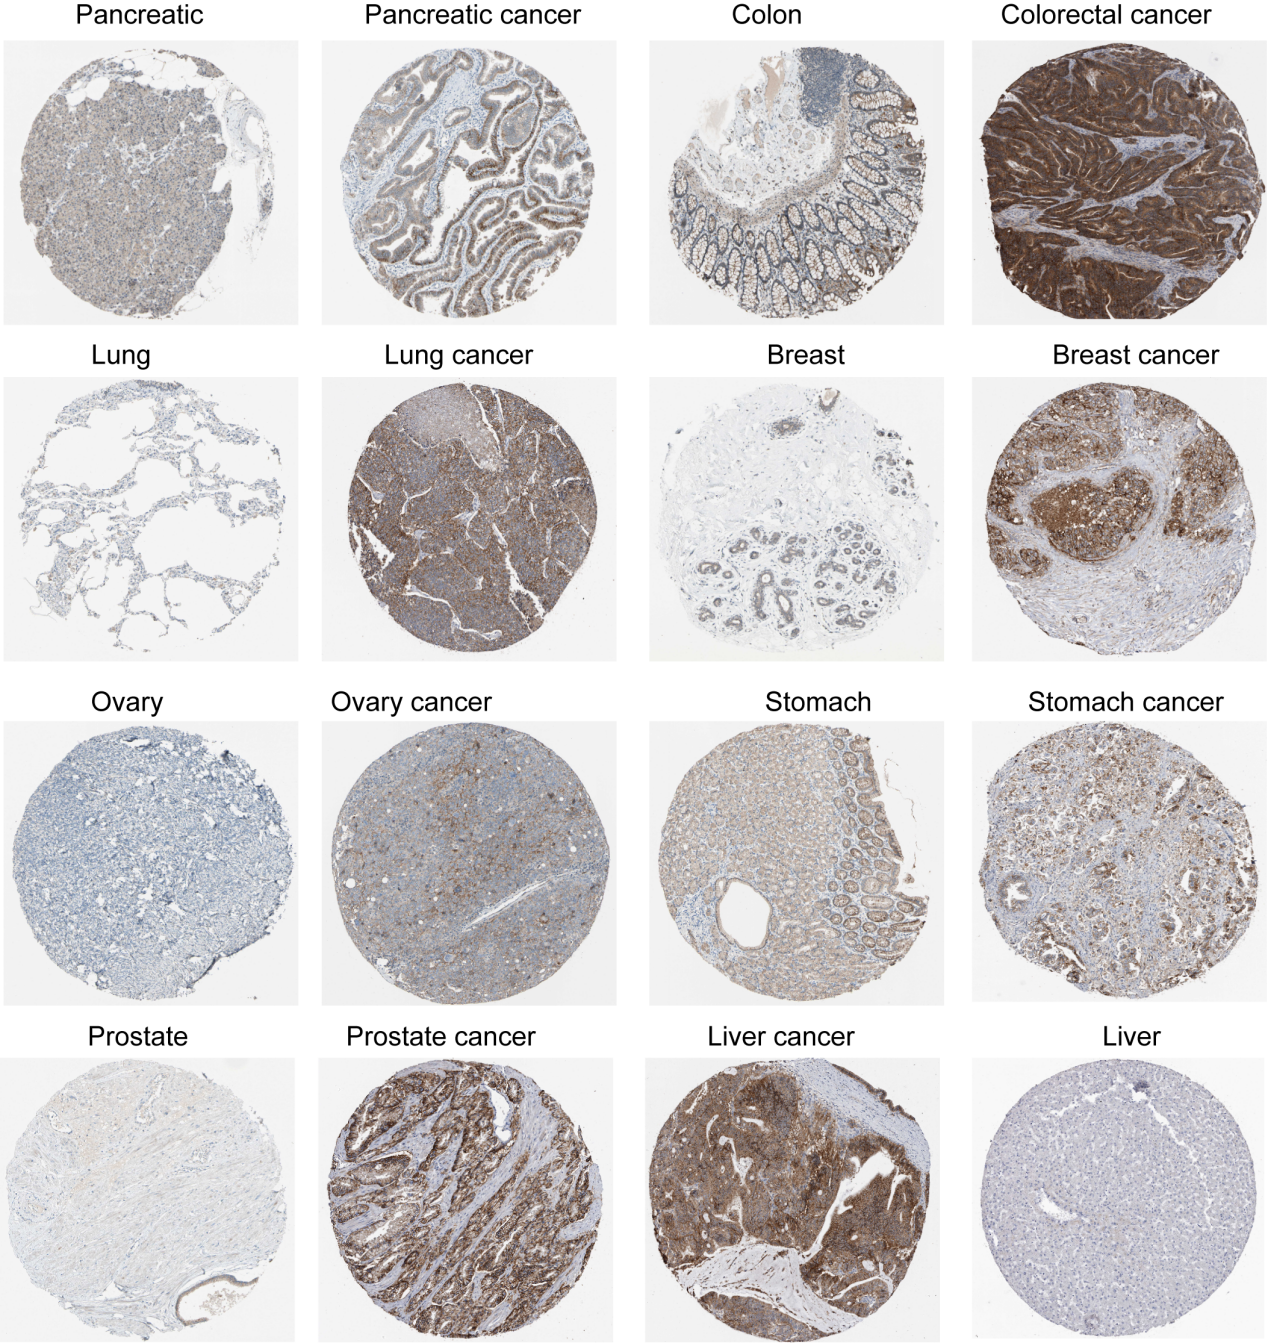


Immunohistochemical images of CDCP1 protein in pancreatic, colon, lung, breast, ovarian, gastric, prostate, and liver cancers and corresponding normal tissues

**Supplementary Fig 3**


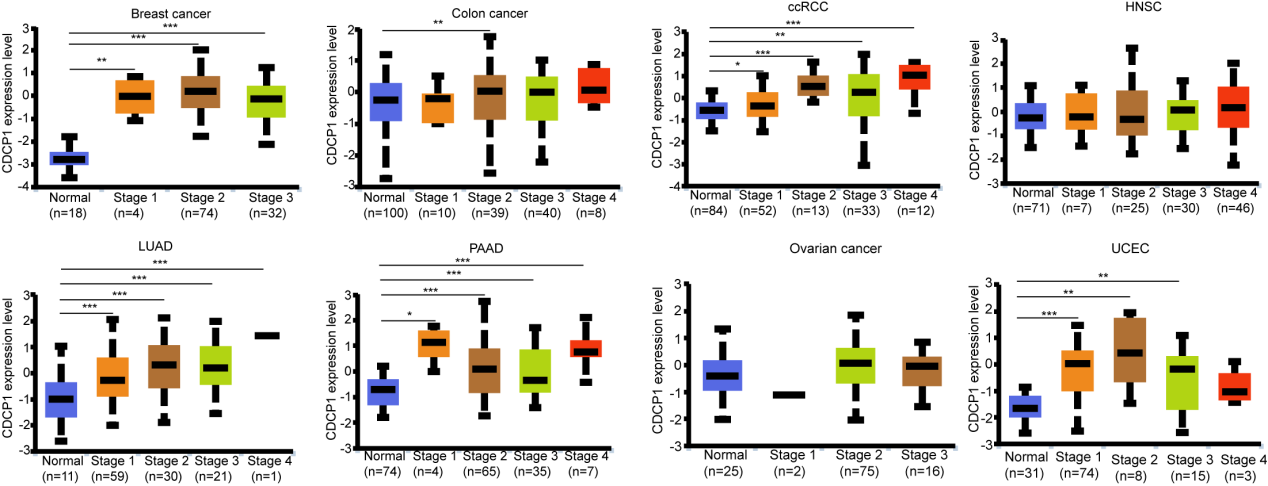


Correlation between CDCP1 protein expression and clinicopathological features of different types of cancer, including breast cancer, colon cancer, ccRCC, LUAD, PAAD, and UCEC. * p < 0.05; ** p < 0.01; *** p < 0.001

**Supplementary Fig 4**


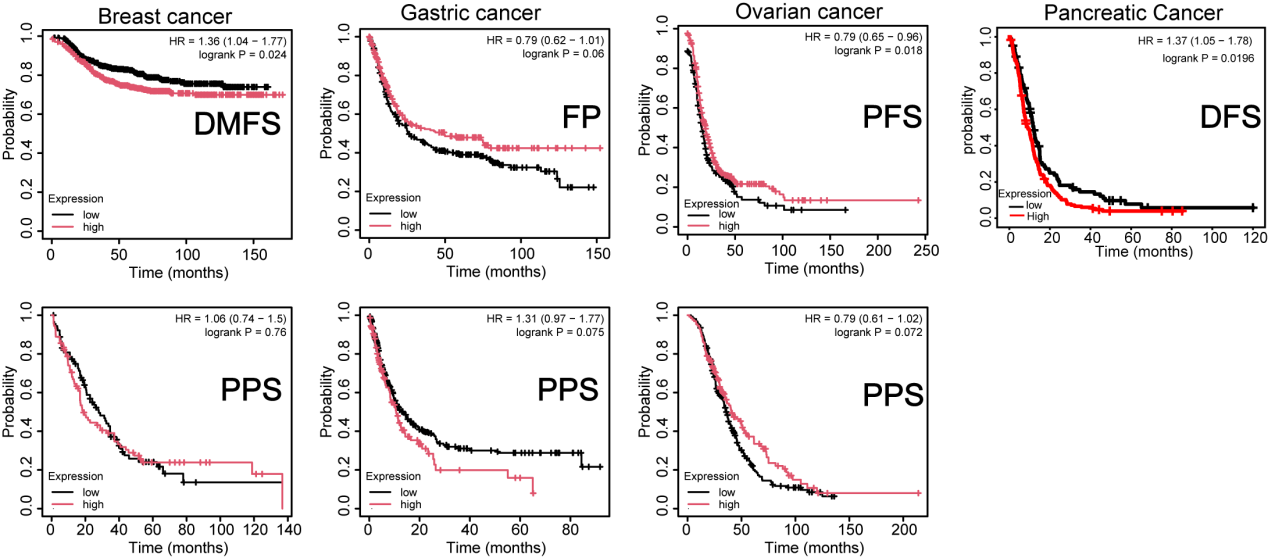


Correlation between CDCP1 gene expression and tumor survival prognosis in TCGA dataset, analyzed by Kaplan-Meier plotter. DMFS: Distant Metastasis Free Survival, PPS: post progression survival, FP: first progression, PFS: Progression Free Survival, DFS: Disease free survival

**Supplementary Fig 5**


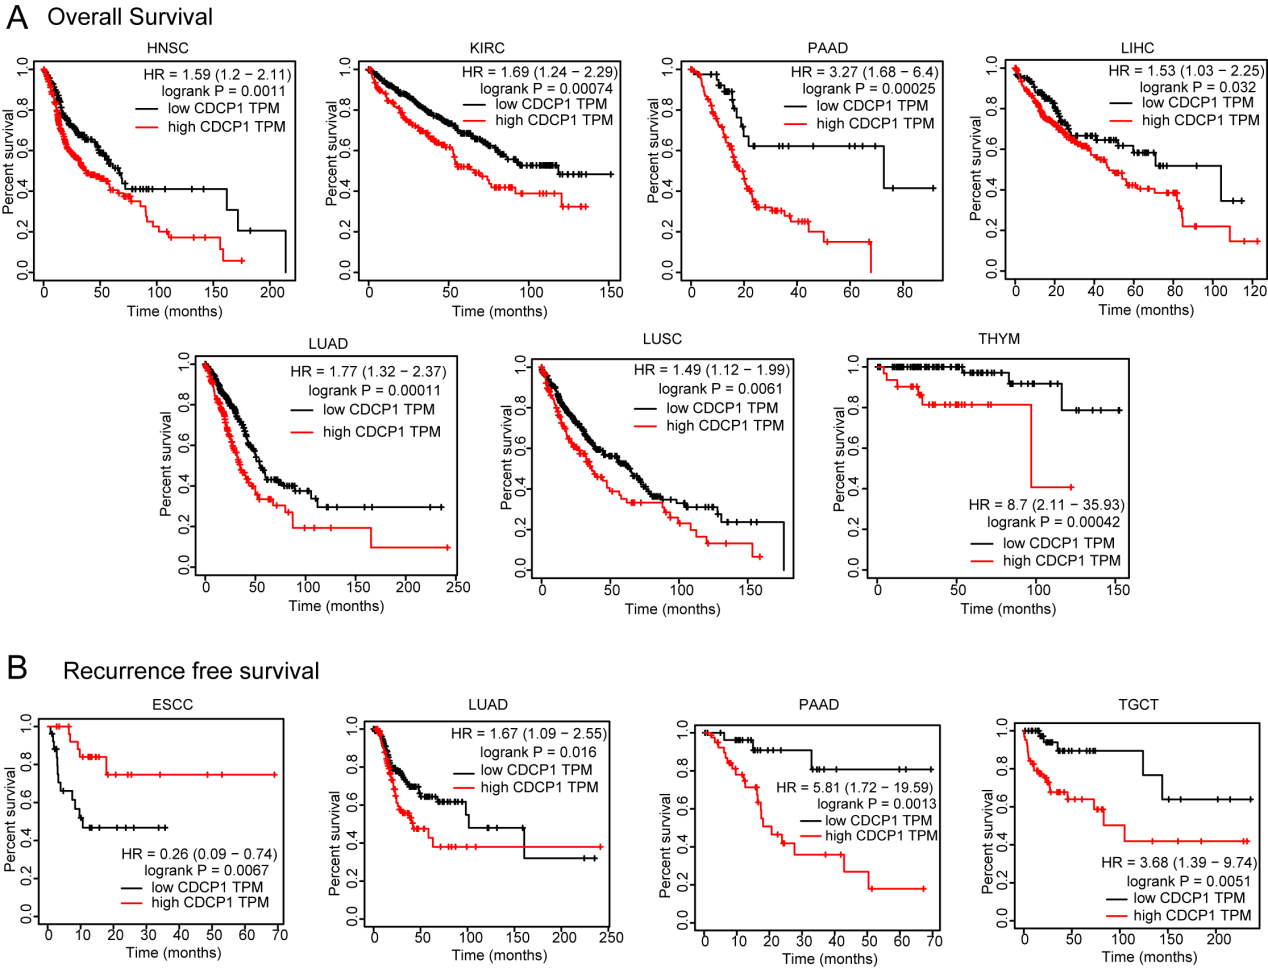


The association between CDCP1 expression and OS (A) and RFS (B) in patients with different types of cancer was examined using the Kaplan-Meier plotter. * p < 0.05; ** p < 0.01; *** p < 0.001

**Supplementary Fig 6**


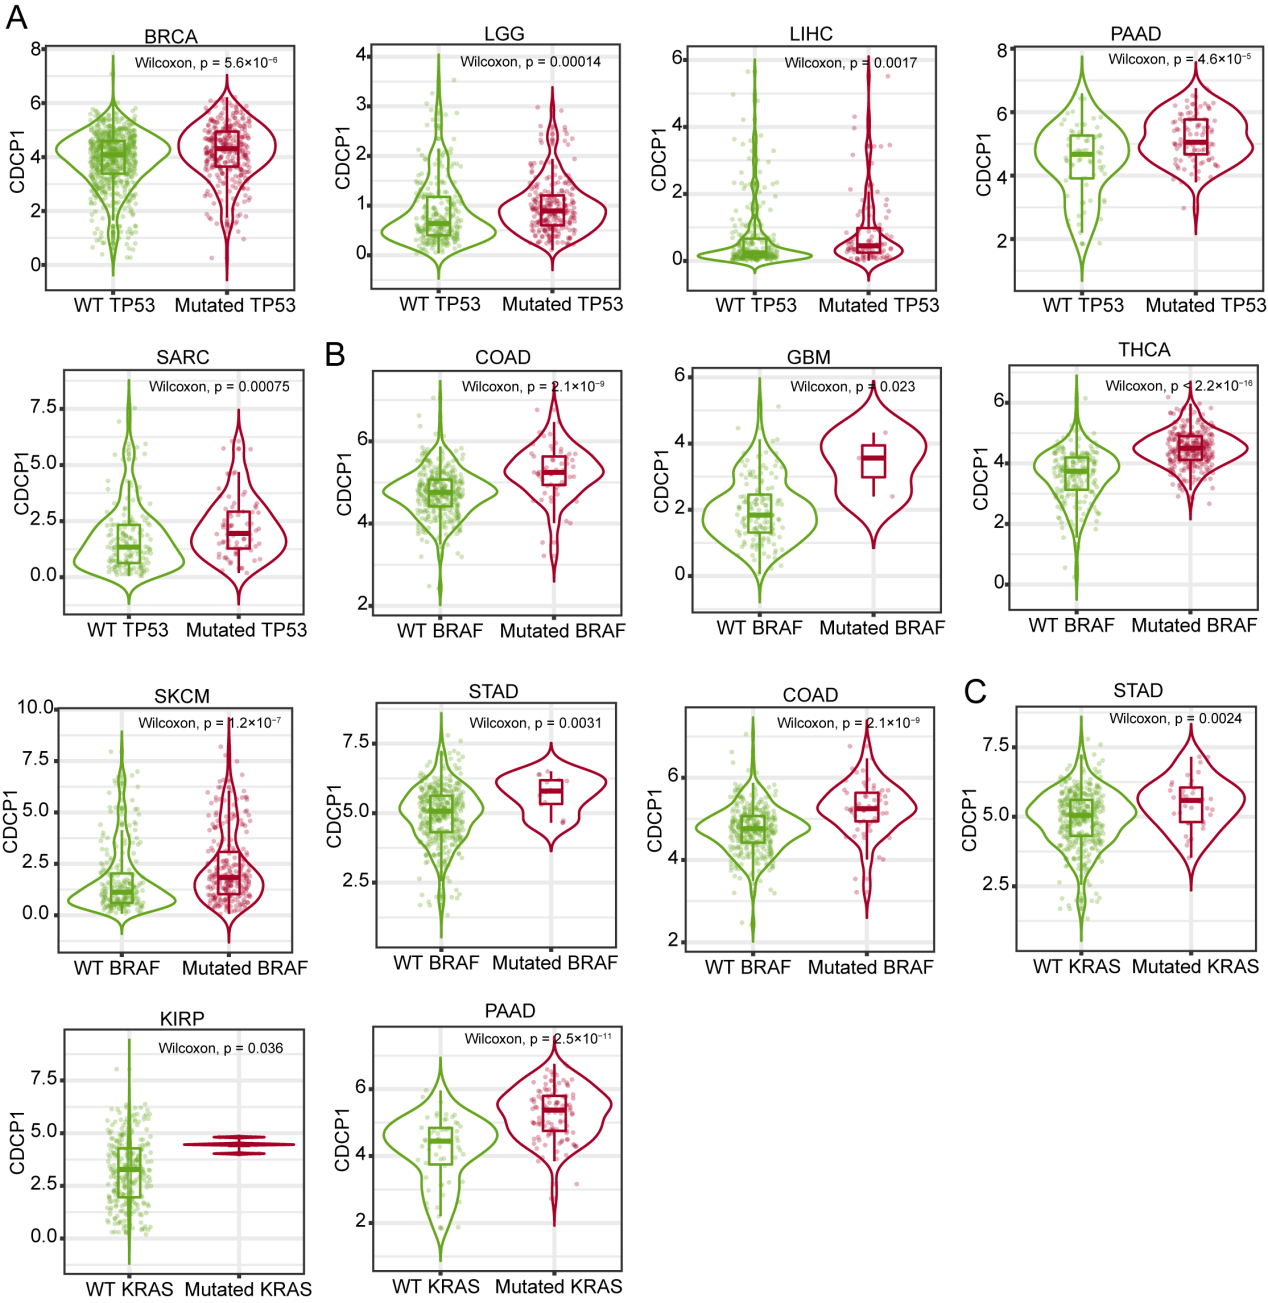


TP53, BRAF and KRAS mutations were more significantly associated with CDCP1 upregulation than TP53, BRAF and KRAS wild-type in various tumor types

**Table S1. Subgroup anslysis on the correlation of CDCP1 expression and prognosis of breast cancer cases**

| Factor | Subgroup | Sample  size | OS  (n=1880) | | RFS  (n=4934) | | DMFS  (n=2767) | | PPS  (n=458) | |
| --- | --- | --- | --- | --- | --- | --- | --- | --- | --- | --- |
| HR | P | HR | P | HR | P | HR | P |
| ER status - IHC | ER positive | 3499 | 1.1 | 0.77 | 1.12 | 0.42 | 1.67 | 0.18 | 2.27 | 0.067 |
| ER negative | 2168 | 1.24 | 0.33 | 1.14 | 0.38 | 1.05 | 0.81 | 0.6 | 0.19 |
| ER status - array | ER positive | 5526 | 1.35 | 0.12 | 0.99 | 0.93 | 1.34 | 0.13 | 1.11 | 0.65 |
| ER negative | 2009 | 1.18 | 0.4 | 0.99 | 0.96 | 1.2 | 0.34 | 1.34 | 0.31 |
| PR status - IHC | PR positive | 1559 | ns | ns | 1.26 | 0.22 | 1.18 | 0.75 | ns | ns |
| PR negative | 1989 | 1.59 | 0.16 | 0.94 | 0.74 | 1.26 | 0.31 | 0 | 0.23 |
| HER2 status - array | HER2 positive | 1273 | 1.63 | 0.059 | 0.95 | 0.76 | 1.17 | 0.49 | 1.19 | 0.58 |
| HER2 negative | 6262 | 1.28 | 0.13 | 1.05 | 0.59 | 1.42 | 0.036 | 1.04 | 0.87 |
| Subtype- StGallen | basal | 1494 | 1.15 | 0.55 | 0.94 | 0.68 | 1.26 | 0.33 | 1.1 | 0.82 |
| Luminsl A | 3511 | 1.31 | 0.27 | 1.03 | 0.84 | 1.44 | 0.15 | 0.94 | 0.82 |
| Luminsl B | 2015 | 1.73 | 0.087 | 0.91 | 0.52 | 1.34 | 0.32 | 1.25 | 0.55 |
| HER2+ | 515 | 1.21 | 0.59 | 1.19 | 0.44 | 1.13 | 0.69 | 1.52 | 0.32 |
| Subtype - PAM50 | basal | 1671 | 1.29 | 0.28 | 0.81 | 0.19 | 1.15 | 0.54 | 1.49 | 0.31 |
| Luminsl A | 2470 | 1.46 | 0.3 | 1.11 | 0.54 | 1.22 | 0.57 | 0.83 | 0.66 |
| Luminsl B | 2005 | 1.12 | 0.68 | 0.99 | 0.95 | 1.46 | 0.22 | 1.24 | 0.51 |
| HER2+ | 1080 | 1.41 | 0.22 | 1.16 | 0.38 | 1.24 | 0.38 | 0.83 | 0.6 |
| Normal | 309 | 4.93 | 0.028 | 1.68 | 0.3 | 1.05 | 0.95 | ns | ns |
| Lymph node status | Lymph node  positive | 2153 | 0.9 | 0.67 | 1.27 | 0.053 | 1.03 | 0.92 | 0.98 | 0.96 |
| Lymph node  negative | 2829 | 2.43 | 0.033 | 1.09 | 0.65 | 1.43 | 0.32 | 2.89 | 0.065 |
| Grade | Grade 1 | 576 | >10 | 0.1 | 6.47 | 0.0049 | NO Result | | 0.43 | 0.49 |
| Grade 2 | 1795 | 1.35 | 0.61 | 1.15 | 0.59 | 0.84 | 0.71 | 4.57 | 0.13 |
| Grade 3 | 2058 | 1.2 | 0.47 | 1.05 | 0.76 | 1.08 | 0.77 | 1.26 | 0.45 |
| TP53 status | mutated | 272 | 1.09 | 0.9 | 0.82 | 0.49 | 1.82 | 0.28 | 7.61 | 0.035 |
| Wild type | 388 | NO Result | | 1.45 | 0.38 | NO Result | | ns | ns |
| Pietenpol subtype | Basal-like 1 | 418 | 1.15 | 0.77 | 1.17 | 0.6 | 2.74 | 0.031 | 1.34 | 0.75 |
| Basal-like 2 | 165 | 3.25 | 0.063 | 1.51 | 0.27 | 1.48 | 0.36 | ns | ns |
| immunomodulatory | 462 | 1.39 | 0.58 | 0.94 | 0.87 | 1.19 | 0.76 | 2.5 | 0.31 |
| mesenchymal | 382 | 1.77 | 0.14 | 1.17 | 0.56 | 2.03 | 0.083 | 0.49 | 0.21 |
| Mesenchymal stem-like | 201 | 0.7 | 0.52 | 0.76 | 0.56 | 1.33 | 0.61 | ns | ns |
| Luminsl  androgen  receptor | 413 | 1.97 | 0.12 | 0.95 | 0.85 | 0.86 | 0.74 | 2.25 | 0.2 |

HR, hazard ratio; OS, overall survival; RFS,relapse free survival; DMFS, distant metastasis free survival; PPS, post progression survival

ER, Estrogen receptor; PR, Progresterone receptor; HER2, human epidermal growth factor receptor-2. TP53,Tumor Protein 53; PAM50, [Prediction Anslysis of Microarray 50](https://www.baidu.com/s?sa=re_dqa_generate&wd=Prediction%20Analysis%20of%20Microarray%2050&rsv_pq=8bc111f3014e1daf&oq=Subtype%20-%20PAM50%E8%8B%B1%E6%96%87%E5%85%A8%E7%A7%B0&rsv_t=e7a8XCSbpp/+U7yTqgX8B2621RQJVHDaM7ZtiiRQyzXa7XA97Hsx2FBQdzif4nUMRG4Z&tn=baiduhome_pg&ie=utf-8) ns, not available data; *p* value less than 0.05 is shown in red

**Table S2. Subgroup anslysis on the correlation of CDCP1 expression and prognosis of colon cancer cases**

| Factor | Subgroup | Sample  size | OS  (n=1061) | | | RFS  (n=1336) | | | PPS  (n=311) | |
| --- | --- | --- | --- | --- | --- | --- | --- | --- | --- | --- |
| HR | P | | HR | P | | HR | P |
| Stage | Stage 1 | 138 | 4.15 | | 0.055 | 0 | | 0.021 | ns | ns |
| Stage 2 | 596 | 0.58 | | 0.016 | 0.5 | | 0.0013 | 0.26 | 7×10-6 |
| Stage 3 | 486 | 1.75 | | 0.0081 | 1.36 | | 0.076 | 1.92 | 0.018 |
| Stage 4 | 216 | 1.72 | | 0.011 | 0.36 | | 0.00087 | 2.57 | 0.017 |
| Location | promixal | 439 | 1.9 | | 0.0019 | 0.69 | | 0.098 | 0.54 | 0.044 |
| distal | 638 | 1.49 | | 0.02 | 1.14 | | 0.44 | 1.72 | 0.016 |
| Stage T | T2 | 101 | 0.23 | | 0.13 | 0 | | 0.043 | ns | ns |
| T3 | 552 | 1.47 | | 0.035 | 0.64 | | 0.024 | 0.7 | 0.2 |
| T4 | 134 | 1.71 | | 0.061 | 0.61 | | 0.082 | 1.7 | 0.15 |
| Stage N | N0 | 414 | 0.77 | | 0.26 | 0.44 | | 0.0017 | 0.48 | 0.027 |
| N1 | 220 | 2.61 | | 0.00057 | 1.49 | | 0.18 | 2.87 | 0.016 |
| N2 | 160 | 1.73 | | 0.046 | 0.65 | | 0.14 | 2.04 | 0.039 |
| Stage M | M0 | 678 | 1.27 | | 0.17 | 0.61 | | 0.0086 | 0.71 | 0.19 |
| M1 | 142 | 2.14 | | 0.022 | 0.3 | | 0.00033 | 2.5 | 0.025 |
| Grade | Grade 1 | 27 | ns | | ns | 1.66 | | 0.58 | ns | ns |
| Grade 2 | 253 | 2.47 | | 0.00051 | 3.43 | | 0.00065 | 8.42 | 0.00061 |
| Grade 3 | 83 | 0.74 | | 0.54 | 0.57 | | 0.37 | ns | ns |
| MSI | stable | 584 | ns | | ns | 4.59 | | 0.00031 | ns | ns |
| Stable or low | 602 | 1.45 | | 0.035 | 0.74 | | 0.059 | 1.44 | 0.063 |
| high | 252 | 2.42 | | 0.15 | 2.35 | | 0.17 | ns | ns |
| BRAF mutation | mutated | 55 | 1.58 | | 0.39 | 2.85 | | 0.051 | ns | ns |
| Wild type | 607 | 1.43 | | 0.032 | 0.62 | | 0.0028 | 0.66 | 0.073 |
| KRAS mutation | mutated | 275 | 1.78 | | 0.012 | 0.65 | | 0.05 | 2.01 | 0.011 |
| Wild type | 420 | 0.83 | | 0.36 | 0.62 | | 0.019 | 0.64 | 0.15 |
| TP53 mutation | mutated | 278 | 1.46 | | 0.11 | 1.79 | | 0.0066 | 0.44 | 0.0081 |
| Wild type | 223 | 0.75 | | 0.36 | 0.49 | | 0.0068 | 1.9 | 0.056 |

HR, hazard ratio; OS, overall survival; RFS,relapse free survival; PPS, post progression survival

MSI, microsatellite; TP53,Tumor Protein 53; ns, no significant differences; *p* value less than 0.05 is shown in red

**Table S3. Subgroup anslysis on the correlation of CDCP1 expression and prognosis of lung cancer cases**

| Factor | Subgroup | Sample  size | OS  (n=2167) | | FP  (n=1252) | | | PPS  (n=477) | |
| --- | --- | --- | --- | --- | --- | --- | --- | --- | --- |
| HR | P | HR | P | | HR | P |
| Histology | adenocarcinoma | 1308 | 1.16 | 0.24 | 1.59 | | 0.0021 | 1.36 | 0.15 |
| Squamous cell carcinoma | 931 | 0.99 | 0.93 | 0.9 | | 0.6 | 0.66 | 0.17 |
| Stage | Stage 1 | 907 | 0.96 | 0.78 | 1.53 | | 0.061 | 1.41 | 0.26 |
| Stage 2 | 478 | 1.06 | 0.71 | 1.59 | | 0.091 | 1.34 | 0.39 |
| Stage 3 | 112 | 1 | 0.99 | ns | | ns | ns | ns |
| Stage 4 | 4 | ns | | | | | | |
| Grade | Grade Ⅰ | 189 | ns | | | | | | |
| Grade Ⅱ | 302 |
| Grade Ⅲ | 75 |
| AJCC stage T | T1 | 467 | 1.06 | 0.75 | 0.98 | | 0.94 | 0.7 | 0.25 |
| T2 | 672 | 1.02 | 0.92 | 0.79 | | 0.32 | 1.56 | 0.098 |
| T3 | 100 | 0.46 | 0.05 | 1.29 | | 0.58 | 0.63 | 0.39 |
| T4 | 44 | 1.07 | 0.88 | 0.86 | | 0.79 | ns | ns |
| AJCC stage N | N0 | 848 | 1.07 | 0.65 | 0.99 | | 0.97 | 1.14 | 0.58 |
| N1 | 296 | 1.12 | 0.66 | 0.96 | | 0.88 | 1.56 | 0.18 |
| N2 | 105 | 2.03 | 0.06 | 3.28 | | 0.014 | 3.48 | 0.02 |
| AJCC stage M | M0 | 819 | 0.92 | 0.51 | 0.78 | | 0.11 | 1.03 | 0.85 |
| M1 | 10 | ns | | | | | | |
| Gender | female | 925 | 1.03 | 0.85 | 1.64 | | 0.019 | 0.76 | 0.39 |
| male | 1545 | 0.87 | 0.13 | 0.86 | | 0.27 | 0.89 | 0.48 |
| Smoking history | Exclude those never smoked | 1007 | 1.31 | 0.15 | 1.39 | | 0.1 | 1.39 | 0.2 |
| Only those never smoked | 247 | 1.35 | 0.47 | 1.93 | | 0.043 | 2 | 0.12 |

HR, hazard ratio; OS, overall survival; FP, first progression; PPS, post progression survival; AJCC, American Joint Committee on Cancer; ns, not available data; *p* value less than 0.05 is shown in red

**Table S4. Subgroup anslysis on the correlation of CDCP1 expression and prognosis of gastric cancer cases**

| Factor | Subgroup | Sample  size | OS  (n=881) | | FP  (n=645) | | PPS  (n=503) | |
| --- | --- | --- | --- | --- | --- | --- | --- | --- |
| HR | P | HR | P | HR | P |
| Stage | Stage 1 | 69 | 0 | 0.024 | 0 | 0.018 | 0 | 0.15 |
| Stage 2 | 145 | 1.72 | 0.094 | 0.59 | 0.091 | 2.6 | 0.0052 |
| Stage 3 | 319 | 0.81 | 0.29 | 0.86 | 0.45 | 1.29 | 0.29 |
| Stage 4 | 152 | 1.32 | 0.21 | 1.32 | 0.23 | 1.36 | 0.18 |
| Stage T | T1 | 14 | ns | | | | | |
| T2 | 253 | 0.74 | 0.18 | 0.66 | 0.055 | 1.67 | 0.032 |
| T3 | 208 | 1.24 | 0.22 | 1.26 | 0.2 | 1.28 | 0.23 |
| T4 | 39 | 0.45 | 0.072 | 0.54 | 0.12 | 0.61 | 0.32 |
| Stage N | N0 | 76 | 0.41 | 0.054 | 0.38 | 0.034 | 0.21 | 0.0038 |
| N1 | 232 | 1.27 | 0.27 | 0.72 | 0.11 | 1.84 | 0.011 |
| N2 | 129 | 1.36 | 0.24 | 1.38 | 0.19 | 1.29 | 0.35 |
| N3 | 76 | 0.72 | 0.24 | 0.67 | 0.15 | 1.34 | 0.33 |
| Stage M | M0 | 459 | 0.84 | 0.26 | 0.79 | 0.08 | 0.81 | 0.19 |
| M1 | 58 | 0.74 | 0.32 | 0.69 | 0.27 | 1.46 | 0.35 |
| Lauren classification | Instestinsl | 336 | 1.63 | 0.0086 | 1.26 | 0.2 | 2.13 | 0.00034 |
| Diffuse | 248 | 0.7 | 0.05 | 0.76 | 0.13 | 0.85 | 0.42 |
| Mixed | 33 | 0.09 | 0.0044 | 0.3 | 0.089 | ns | ns |
| Differentiation | Poorly differentiated | 166 | 1.72 | 0.058 | 1.56 | 0.097 | 1.53 | 0.2 |
| Moderately differentiated | 67 | 2.27 | 0.013 | 1.65 | 0.12 | 4.12 | 0.0045 |
| Well differentiated | 32 | NO Result | | ns | | | |

HR, hazard ratio; OS, overall survival; FP, first progression; PPS, post progression survival; ns, not available data; *p* value less than 0.05 is shown in red

**Table S5. Subgroup anslysis on the correlation of CDCP1 expression and prognosis of ovarian cancer cases**

| Factor | Subgroup | Sample  size | OS  (n=1657) | | PFS  (n=1436) | | PPS  (n=782) | |
| --- | --- | --- | --- | --- | --- | --- | --- | --- |
| HR | P | HR | P | HR | P |
| Histology | Endometrioid | 62 | ns | ns | 1.98 | 0.24 | ns | ns |
| Serous | 1232 | 0.82 | 0.1 | 0.83 | 0.082 | 0.87 | 0.29 |
| Stage | Stage 1 | 107 | 0.42 | 0.22 | 0.34 | 0.081 | ns | ns |
| Stage 2 | 72 | 0.27 | 0.1 | 0.48 | 0.19 | 0.15 | 0.053 |
| Stage 3 | 1079 | 0.8 | 0.092 | 0.77 | 0.026 | 0.81 | 0.14 |
| Stage 4 | 189 | 0.47 | 0.041 | 0.73 | 0.25 | 0.55 | 0.11 |
| Grade | Grade1 | 56 | 2.24 | 0.28 | 2.93 | 0.16 | ns | ns |
| Grade2 | 325 | 0.67 | 0.097 | 1.38 | 0.087 | 1.46 | 0.14 |
| Grade3 | 1024 | 0.8 | 0.078 | 0.79 | 0.075 | 0.74 | 0.057 |
| Grade4 | 21 | 0.35 | 0.056 | ns | ns | ns | ns |
| TP53 mutation | mutated | 516 | 0.81 | 0.33 | 0.57 | 0.0031 | 1.14 | 0.52 |
| Wild type | 102 | 0.33 | 0.054 | 0.34 | 0.057 | 0.37 | 0.086 |

HR, hazard ratio; OS, overall survival; PFS, progress free survival; PPS, post progression survival; TP53,Tumor Protein 53; ns, not available data; *p* value less than 0.05 is shown in red.

# Correlation analysis between CDCP1 expression and immune infiltration.

# We investigated the various immune cells infiltration level in diverse cancer types in the TIMER database. As shown in Table S6, the results revealed the CDCP1 expression level was significantly correlated with MDSC infiltration in BLCA, LGG, LIHC, LUAD, LUSC, OV, PAAD, PCPG, SKCM and STAD. However, there was no universally significant correlation between CDCP1 expression and the other subgroup immune cells infiltration, which included B cells, CD4+ T cells, CD8+ T cells, Treg, Tfh, γδ T cells, monocytes, macrophage, neutrophil, and DC.

**Table S6**. **Correlation analysis between CDCP1 expression and immune infiltration.**

| Cell Type | Description | BLCA (n=408) | LGG  (n=516) | LIHC (n=371) | LUAD (n=515) | LUSC  (n=501) | OV  (n=303) | PAAD (n=179) | PCPG  (n=181) | SKCM  (n=471) | STAD (n=415) |
| --- | --- | --- | --- | --- | --- | --- | --- | --- | --- | --- | --- |
| B cell | Cox | -0.169 | -0.349 | 0.123 | -0.17 | -0.281 | -0.133 | -0.305 | 0.023 | -0.158 | -0.174 |
| *p* | ** | *** | * | *** | *** | * | *** | ns | *** | *** |
| CD4 | Cox | 0.102 | -0.294 | 0.116 | 0.37 | 0.265 | 0.236 | 0.139 | 0.041 | 0.156 | 0.158 |
| *p* | * | *** | * | *** | *** | *** | ns | ns | *** | ** |
| CD8 | Cox | -0.102 | -0.361 | 0.073 | -0.133 | -0.19 | -0.095 | 0.152 | -0.086 | 0.157 | -0.012 |
| *p* | ns | *** | ns | ** | *** | ns | * | ns | *** | ns |
| Tregs | Cox | -0.225 | 0.188 | 0.211 | -0.093 | -0.083 | 0.125 | 0.063 | 0.199 | -0.106 | -0.079 |
| *p* | *** | *** | *** | ns | ns | * | ns | ** | * | ns |
| Tfh | Cox | 0.047 | -0.297 | 0.131 | -0.186 | -0.152 | -0.047 | -0.08 | -0.1 | -0.15 | 0.184 |
| *p* | ns | *** | * | *** | *** | ns | ns | ns | ** | *** |
| γδ T | Cox | -0.125 | 0.013 | -0.041 | -0.166 | -0.149 | -0.196 | -0.064 | -0.023 | 0.072 | -0.067 |
| *p* | * | ns | ns | *** | ** | ** | ns | ns | ns | ns |
| Monocyte | Cox | 0.306 | 0.356 | 0.506 | 0.311 | -0.016 | 0.267 | -0.038 | 0.314 | 0.379 | 0.131 |
| *p* | *** | *** | *** | *** | ns | *** | ns | *** | *** | * |
| Macrophage | Cox | 0.016 | 0.42 | 0.507 | 0.237 | 0.076 | 0.094 | 0.056 | 0.334 | 0.187 | -0.14 |
| *p* | ns | *** | *** | *** | ns | ns | ns | *** | *** | ** |
| Neutrophil | Cox | 0.213 | -0.06 | 0.017 | -0.083 | 0.263 | 0.217 | 0.342 | 0.065 | 0.242 | 0.277 |
| *p* | *** | ns | ns | ns | *** | *** | *** | ns | *** | *** |
| DC | Cox | 0.017 | 0.439 | 0.499 | 0.111 | -0.187 | 0.104 | -0.157 | 0.168 | 0.223 | -0.17 |
| *p* | ns | *** | *** | * | *** | ns | * | * | *** | *** |
| MDSC | Cox | 0.319 | -0.348 | 0.38 | 0.183 | 0.288 | -0.199 | 0.517 | -0.397 | 0.127 | 0.156 |
| *p* | *** | *** | *** | *** | *** | ** | *** | *** | ** | ** |

Treg, regulation T cell; Tfh, follicular helper T cell; DC, dendritic cell; MDSC, Myeloid derived suppressor cell; Cox, R value of Spearman’s correlation. * p < 0.05, ** p < 0.01, *** p < 0.001, ns, no significant differences
